# Supplementary material for: Photothermally induced accumulation and retention of polymeric nanoparticles in tumors for long-term fluorescence imaging
Source: Royal Society of Chemistry journal article supplement (doi:10.1039/c6tb02650h), 2017-01-01
Supplement: c6tb02650h1.pdf [file c6tb02650h1.pdf]

Supplementary information:

## A photothermal induced accumulation and retention of polymeric nanoparticles in tumor for long-term fluorescent imaging

Haozhe He,<sup>a</sup> Xiaohua Zheng,<sup>a,b</sup> Jianxu Zhang,<sup>a,b</sup> Shi Liu,<sup>a</sup> Xiuli Hu<sup>a</sup> and Zhigang Xie<sup>\*a</sup>

<sup>a</sup> State Key Laboratory of Polymer Physics and Chemistry, Changchun; Institute of Applied Chemistry, Chinese Academy of Sciences, Changchun, 130022, P. R, China . Fax: +86-431-85262775; Tel: +86-431-85262775; E-mail: xiez@ciac.ac.cn

<sup>b</sup> University of Chinese Academy of Sciences, Beijing 100049, P. R, China .

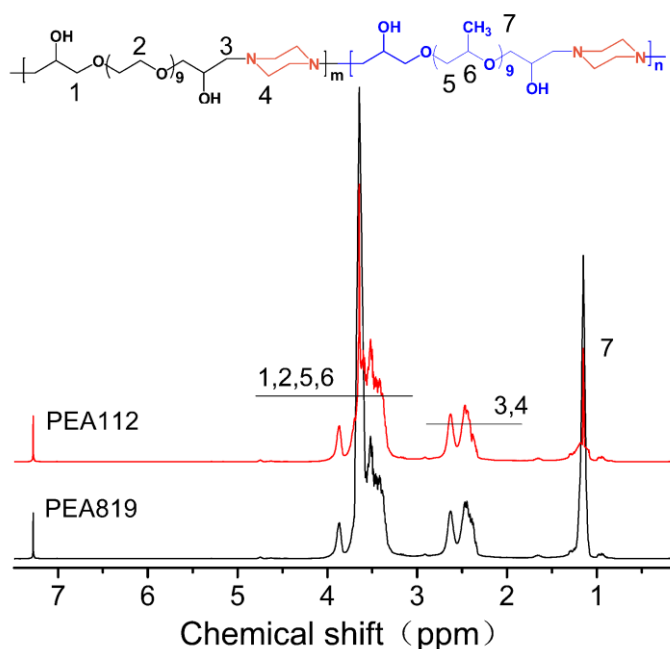

Fig. S1 <sup>1</sup>H-NMR of PEA112 and PEA819 in CDCl<sub>3</sub>.

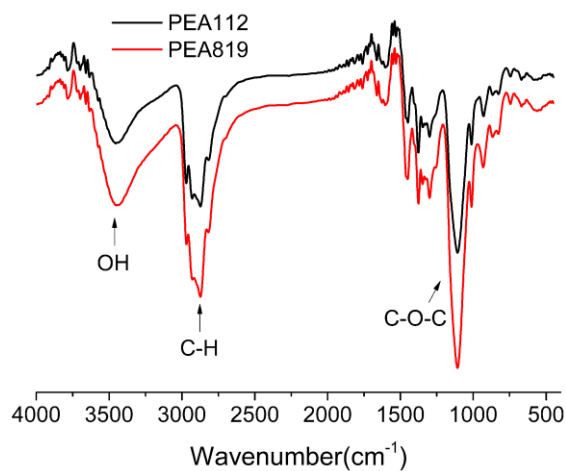

Fig. S2 FTIR characterization of PEA112 and PEA819.

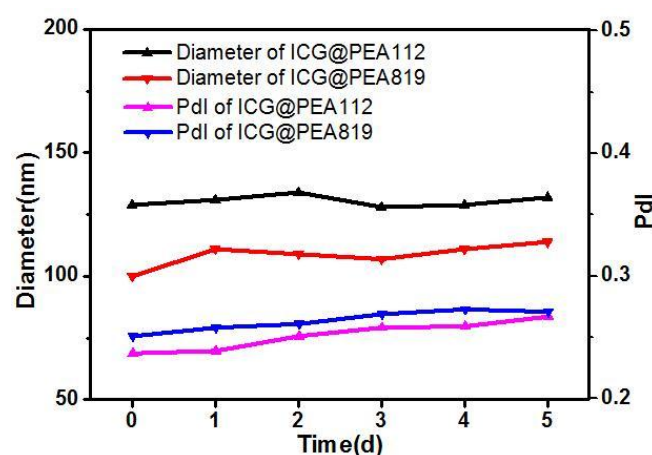

**Fig. S3** Size stability test of ICG@PEA112 and ICG@PEA819 in water.

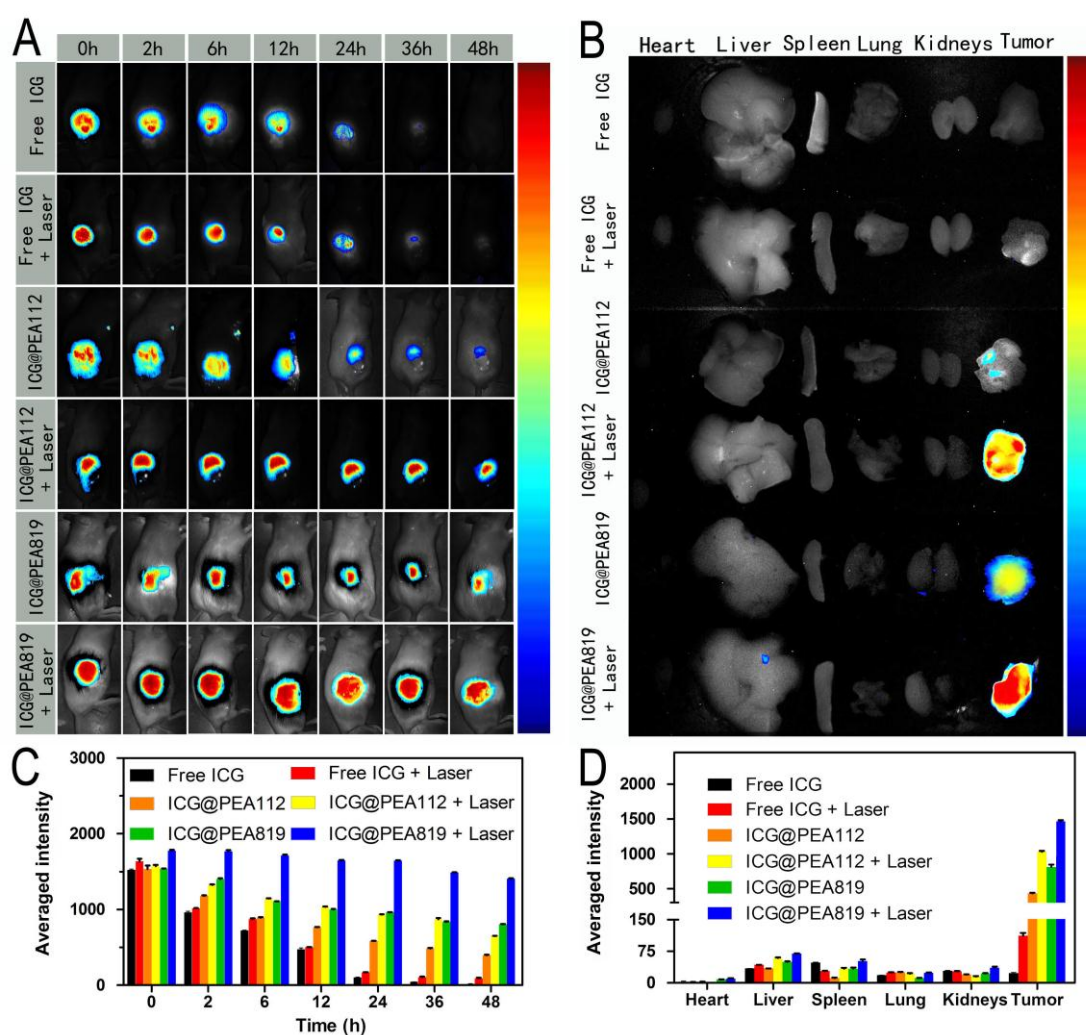

**Fig. S4** In vivo imaging and biodistribution analysis of mice bearing U14 tumors after intratumoral injection of free ICG, free ICG + laser, ICG@PEA112, ICG@PEA112 + laser, ICG@PEA819 and ICG@PEA819 + laser: (A) Time-lapse NIR fluorescence images of mice; (B) NIR fluorescence images of major organs and tumors after 48 h post-injection; (C) NIR fluorescence intensities of the tumors were quantified at indicated time points; and (D) semiquantitative biodistribution in mice determined by the averaged fluorescence intensity of organs and tumor. The data are shown as mean  $\pm$  SD ( $n = 3$ ).

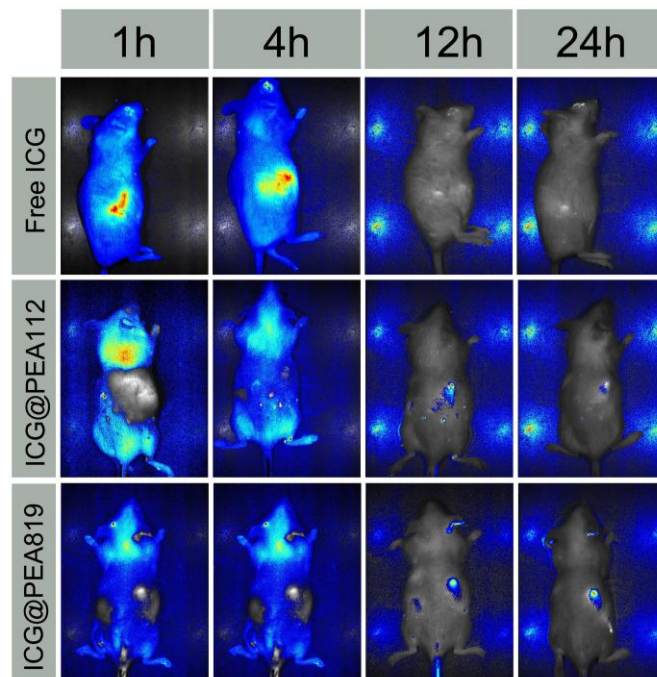

**Fig. S5** Time-lapse NIR fluorescence images of mice bearing U14 tumors after tail intravenous injection of free ICG, ICG@PEA112 and ICG@PEA819.

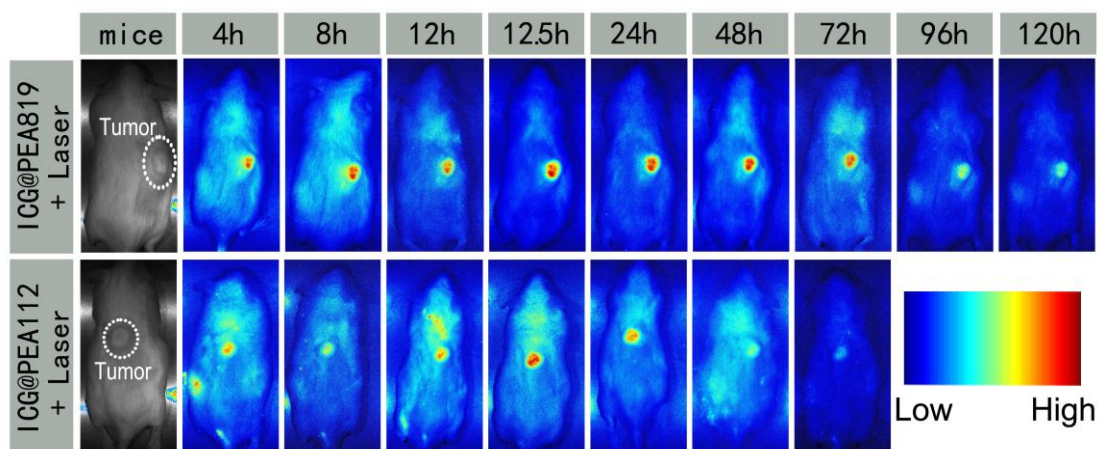

**Fig. S6** Time-lapse NIR fluorescence images of mice bearing U14 tumors after tail vein injection of ICG@PEA819 and ICG@PEA112 (the tumors are circled with a dotted line, under laser radiation after 12h).
